# Supplementary material
Source: PubMed Central journal article supplement (PMC1895519)
Supplement: blood_blood-2006-04-014688_1.pdf [file blood_blood-2006-04-014688_1.pdf]

| <b>Chr.</b> | <b>Marker</b> | <b>cM</b> |
|-------------|---------------|-----------|
| 1           | D1Mit18       | 29.7      |
|             | D1Mit9        | 52.0      |
|             | D1Mit37       | 101.0     |
| 2           | D2Mit1        | 1.0       |
|             | D2Mit7        | 28.0      |
|             | D2Mit200      | 107.0     |
| 3           | D3Mit24       | 22.0      |
|             | D3Mit11       | 49.0      |
|             | D3Mit219      | 84.9      |
| 4           | D4Mit38       | 19.8      |
|             | D4Mit204      | 61.9      |
| 5           | D5Mit9        | 54.0      |
|             | D5Mit51       | 81.0      |
| 6           | D6Mit116      | 5.5       |
|             | D6Mit3        | 33.5      |
|             | D6Mit177      | 38.5      |
|             | D6Mit12       | 59.6      |
| 7           | D7Mit168      | 1.5       |
|             | D7Mit321      | 48.5      |
|             | D7Mit177      | 72.0      |
| 8           | D8Mit207      | 41.0      |
| 9           | D9Mit67       | 17.0      |
| 10          | D10Mit90      | 30.0      |
|             | D10Mit42      | 44.0      |
| 11          | D11Mit20      | 20.0      |
|             | D11Mit298     | 40.0      |
|             | D11Mit104     | 79.0      |
| 12          | D12Mit54      | 24.0      |
|             | D12Mit196     | 57.9      |
| 13          | D13Mit18      | 18.0      |
|             | D13Mit77      | 73.0      |
| 14          | D14Mit45      | 12.5      |
|             | D14Mit35      | 44.0      |
| 15          | D15Mit6       | 13.7      |
|             | D15Mit76      | 53.2      |
| 16          | D16Mit29      | 13.2      |
|             | D16Mit49      | 53.0      |
| 17          | D17Mit49      | 23.2      |
|             | D17Mit123     | 56.7      |
| 18          | D18Mit14      | 18.0      |
|             | D18Mit184     | 41.0      |
| 19          | D19Mit5       | 34.0      |
|             | D19Mit91      | 47.0      |
| X           | DXMit42       | 30.6      |
|             | DXMit98       | 65.2      |
