# Supplementary material
Source: PubMed Central journal article supplement (PMC1895519)
Supplement: blood_blood-2006-04-014688_2.pdf [file blood_blood-2006-04-014688_2.pdf]

| Primer | VWF Fragment     | SEQUENCING / AMPLIFICATION                                  | Description                             |
|--------|------------------|-------------------------------------------------------------|-----------------------------------------|
| 1      | cDNA-1           | AACTTGGAGCTATTGCAGGC                                        | 5'UTR (1-F)                             |
| 2      | cDNA-1           | GGCAGTAGCAGCCTTCAAGA                                        | Amplifies fragment with EcoRI (1-R)     |
| 3      | cDNA-1           | aaaagcggccgcAACTTGGAGCTATTGCAGGCAGAGGAATGGGC                | 5'UTR with NotI (1-Fnest)               |
| 4      | cDNA-1           | TTCATCCGGGAGGGAGAG                                          | Amplifies fragment with EcoRI (1-Rnest) |
| 5      | cDNA-2           | CAGGTGTACCTGCAGTGTGG                                        | Amplifies fragment with EcoRI (2-F)     |
| 6      | cDNA-2           | TAGCGGACCAAATTCCTAGC                                        | Amplifies fragment with NheI (2-R)      |
| 7      | cDNA-2           | CTGGCTAGCAGTCAGGAGCA                                        | Amplifies fragment with NheI (2-Rnest)  |
| 8      | cDNA-3           | TGGCCTCTACCAGTGAGGTT                                        | Amplifies fragment with NheI (3-F)      |
| 9      | cDNA-3           | GCAAAAATTGACCGCCTGAAGC                                      | Amplifies fragment with NheI (3-Fnest)  |
| 10     | cDNA-3           | ATCCACTGCCATCTCCATGT                                        | Amplifies fragment with SphI (3-R)      |
| 11     | cDNA-3           | GAGACGCCAGCATGCTTAAT                                        | Amplifies fragment with SphI (3-Rnest)  |
| 12     | cDNA-4           | AAGCCTGCATGAAGTCCATT                                        | Amplifies fragment with SphI (4-F)      |
| 13     | cDNA-4           | ATTAAGCATGCTGGCGTCTC                                        | Amplifies fragment with SphI (4-Fnest)  |
| 14     | cDNA-4           | tctagaCTTGTCTGCAGTTCGGGGGAGAACAC                            | VWF 3' with XbaI (4-R)                  |
| 15     | 5'RACE           | CCTGTACGGGGCTTTTCTGTG                                       | Outer 5' RACE (Exon 2-R)                |
| 16     | 5'RACE           | TCTTGGCCATACAAACAGGGGCTGTA                                  | Inner 5' RACE (Exon 1-R)                |
| 17     | 3'RACE           | ACTGCACCAATGGCTCTGTC                                        | Exon 52-F                               |
| 18     | Exon 11          | TTGTCATGGGGAAAAGGGTA                                        | PolyPhred, intron 10 (F)                |
| 19     | Exon 11          | CCACTTAGCCCTCCATTTCA                                        | PolyPhred, intron 11 (R)                |
| 20     | Exon 11          | CCTATGGATCTGCAGCAATG                                        | PolyPhred, exon 10 (F)                  |
| 21     | Exon 11          | TGCTCCCCCGTCTTCAGTTT                                        | PolyPhred, exon 12 (R)                  |
| 22     | +774             | GGGAGCAATGCCAGCTACT                                         | FE, exon 7 (F)                          |
| 23     | +774             | GGCACTGTGGTCACTCCAG                                         | FE, exon 7 (R)                          |
| 24     | +774             | CAGACAGCATCAGGGTCATC                                        | FE, exon 12 (R)                         |
| 25     | +774             | CATGCGCACTTGGCCCCGT                                         | FE, exon 7 SNP, 5'Cy-5 labeled (R)      |
| 26     | +7970            | TATCGGGAAGAGAAGGCCA                                         | FE, exon 48 (F)                         |
| 27     | +7970            | CTTGCTTCAGGGTCATGATC                                        | FE, exon 48 (R)                         |
| 28     | +7970            | AGTTCCGGGAGAACACCT                                          | FE, exon 52 (R)                         |
| 29     | +7970            | TATTCAGCTAAGAGGAGGAC                                        | FE, exon 48 SNP, 5'Cy-5 labeled (F)     |
| 30     | "A" Upper Strand | CTAGAGCGGCCGCTGCTGAATTCTGCTGCTAGCTGCTGCATGCTGCTTCTAGATGATAG |                                         |
| 31     | "A" Lower Strand | GCCTATCATCTAGAAGCAGCATGCAGCAGCTAGCAGCAGAATTCAGCAGCGCCGCT    |                                         |
| 32     | "+" Upper Strand | CTAGAGAACAAAACTCATCTCAGAAGAGGATCTGTGAG                      |                                         |
| 33     | "+" Lower Strand | GGCCTCACAGATCCTCTCTGAGATGAGTTTTTGTCT                        |                                         |
| 34     | AA2657           | TAAGAGGAGGACgGATCATGACCCT                                   | A/J Strand                              |
| 35     | AA122            | GACTCTACCTAGAACiTGAGGCTGGGTACTATAAG                         | A/J Upper Strand                        |
| 36     | AA122            | CTTATAGTACCCAGCCTCaGTTCTAGGTAGAGTC                          | A/J Lower Strand                        |
| 37     | AA122            | GACTCTACCTAGAACgCGAGGCTGGGTACTATAAG                         | CASA/Rk Upper Strand                    |
| 38     | AA122            | CTTATAGTACCCAGCCTCgGTTCTAGGTAGAGTC                          | CASA/Rk Lower Strand                    |
