# Supplementary material
Source: PubMed Central journal article supplement (PMC1895519)
Supplement: blood_blood-2006-04-014688_3.pdf [file blood_blood-2006-04-014688_3.pdf]

| Primer | VWF Fragment   | Primer 5' --> 3'               | Description |
|--------|----------------|--------------------------------|-------------|
| 39     | 5' gDNA        | CTAGTCCTTGCTGTCTGGAG           | (1-F)       |
| 40     | 5' gDNA        | AGGCCAGAAAGCCTCTTCA            | (1-R)       |
| 41     | 5' gDNA        | GGCTGGCTCAAACCTCATAG           | (1-Fnest)   |
| 42     | 5' gDNA        | ACAGCAGAGGGACCATAGGA           | (1-Rnest)   |
| 43     | Intron 3       | TGGGGACGACTTCATCAACACG         | (1-F)       |
| 44     | Intron 3       | GGCTCCCTTCTTTCTGATGA           | (1-R)       |
| 45     | Intron 3       | AGGGGGCTGCAGTTATCTCC           | (1-Fnest)   |
| 46     | Intron 3       | GCCAGAACAAAGAGCATTCC           | (1-Rnest)   |
| 47     | Intron 3       | CTTTTGAGTGTGGGGTAATAGA         | (2-F)       |
| 48     | Intron 3       | CCTCTCCCTGGCTCAT               | (2-R)       |
| 49     | Intron 3       | ACCAACTCTCTGGCTTCCT            | (2-Fnest)   |
| 50     | Intron 3       | GCGTGGAAGAACTTCCCTGT           | (2-Rnest)   |
| 51     | Intron 3       | TCACTGTGAGTGACATTGAGGAG        | (3-F)       |
| 52     | Intron 3       | GGGATTGGTGCTACATGACA           | (3-R)       |
| 53     | Intron 3       | GCTTGGGTTAGGTGGAGAAC           | (3-Fnest)   |
| 54     | Intron 3       | TCACTGGGGTTTCAAATGCT           | (3-Rnest)   |
| 55     | Intron 3       | TAATTGGGGCTGCTTACAG            | (4-F)       |
| 56     | Intron 3       | TGGCGGGGTCATATTACATT           | (4-R)       |
| 57     | Intron 3       | AGGTGTGGTGTGGAGAAGG            | (4-Fnest)   |
| 58     | Intron 3       | GGCAGTTTGAATTGCCCTTA           | (4-Rnest)   |
| 59     | Intron 12      | ACCCTGATGCTGTCTGCAC            | (1-F)       |
| 60     | Intron 12      | CCACGGCCATCCCAGTCCATCT         | (1-R)       |
| 61     | Intron 12      | GCACAACAGCCTGGTGAAC            | (1-Fnest)   |
| 62     | Intron 12      | CAGAAGCCATCACTGTGTGC           | (1-Rnest)   |
| 63     | Intron 13      | CAGCACACAGTGATGGCTTCGTA        | (1-F)       |
| 64     | Intron 13      | TTATTTTCAAGGGAAAAGTACTTACAAAT  | (1-R)       |
| 65     | Intron 13      | ATGGCTTCTGTACGCTCAGCTAT        | (1-Fnest)   |
| 66     | Intron 13      | AGTACTTACAAATGTCTGTTAGGAAACAAG | (1-Rnest)   |
| 67     | Intron 13      | CTCAACACAATGAGGGTTAGTTCAC      | (2-F)       |
| 68     | Intron 13      | TATGTCTGTGACTAAAGTGACTATCAACAG | (2-R)       |
| 69     | Intron 13      | GGTGTGAGGATGTTGTTAGATTCTT      | (2-Fnest)   |
| 70     | Intron 13      | GTTGGACAGATATTAGTTACAAACAGACAA | (2-Rnest)   |
| 71     | Intron 13      | AGTAAGTAAGCAGCAAGAAAAATACCAT   | (3-F)       |
| 72     | Intron 13      | CCACAGGCTTCCCGAATAGACT         | (3-R)       |
| 73     | Intron 13      | CTCCTTAACGATTCATTTAATAGAAGACAG | (3-Fnest)   |
| 74     | Intron 13      | ACAATGGTCCACTTAGTTAATGAGAT     | (3-Rnest)   |
| 75     | Intron 21      | GAGCTTGAACCTGTTGACGGAGAG       | (1-F)       |
| 76     | Intron 21      | CACATTGCAGACATTATTCTACTTTATTAT | (1-R)       |
| 77     | Intron 21      | TGCTGAACATAGCTTCTTCATAGTTTA    | (1-Rnest)   |
| 78     | Intron 21      | GTCAACCATTAAAGATAACAGAGTCAT    | (2-F)       |
| 79     | Intron 21      | AGCAAACCTGCTAAACAGTTTTTCTTC    | (2-R)       |
| 80     | Intron 21      | CTGCCTGTAGAAAATGTACTTCCAGT     | (2-Rnest)   |
| 81     | Intron 21      | AGATTAAGATTCTGACAAGCAGAGAAG    | (3-F)       |
| 82     | Intron 21      | ATTCATCTCTCAGGGGCTCTTAAC       | (3-R)       |
| 83     | Intron 21      | CTTGACCCTGATGTTTTGTTAATAC      | (3-Fnest)   |
| 84     | Intron 21      | CTTAACGTTACCTGAAGGAGGAAGA      | (3-Rnest)   |
| 85     | Introns 50, 51 | GTGACACATGTGAGTCCATTACTTATATT  | (1-F)       |
| 86     | Introns 50, 51 | AGATTTCAATCTTGAGCTTAGTTTTATTTT | (1-R)       |
| 87     | Introns 50, 51 | CTTCTATGCACCTTAGAATCCTTGAT     | (2-F)       |
| 88     | Introns 50, 51 | CATATAGACAGATGACAGTTGCTTTTATAC | (2-R)       |
| 89     | Introns 50, 51 | CTAATTGGATGGTTTTGGAGATGTGTACTA | (2-Fnest)   |
| 90     | Introns 50, 51 | TAACATAACTAATGGACAATGAAGTAGCC  | (2-Rnest)   |
| 91     | Introns 50, 51 | CTACAGAGGAAATGAATATGAATGTGAC   | (3-F)       |
| 92     | Introns 50, 51 | GTCATAGCATGGGTATCAGTAGGAAT     | (3-R)       |
| 93     | Introns 50, 51 | ATTTGCCTTCTTAGCCAAATATAGTCAT   | (3-Fnest)   |
| 94     | Introns 50, 51 | CGATGTCAATGGAGTACACAGCTT       | (3-Rnest)   |
| 95     | 3' gDNA        | ACTGCACCAATGGCTCTGTC           | (1-F)       |
| 96     | 3' gDNA        | TGAGTCTGAAAGCCATGTAGGA         | (1-R)       |
| 97     | 3' gDNA        | GTACCACGAGGTCATCAACG           | (1-Fnest)   |
| 98     | 3' gDNA        | TGGATGAGGGCCATAGGTAG           | (1-Rnest)   |
